# Supplementary material for: PCSK9 Inhibitor Use in the Real World: Data From the National Patient‐Centered Research Network
Source: PubMed Central journal article supplement — J Am Heart Assoc. 2019 Apr 25;8(9):e011246. doi: 10.1161/JAHA.118.011246 (PMC6512121; doi:10.1161/jaha.118.011246), 2019-04-25
Supplement: JAH3-8-e011246-s001.pdf [file JAH3-8-e011246-s001.pdf]

# **SUPPLEMENTAL MATERIAL**

**Table S1. List of Participating Clinical Data Research Networks and Datamarts.**

| <b>Participating CDRN</b> | <b>Participating Partners within CDRN</b>                                                                    |
|---------------------------|--------------------------------------------------------------------------------------------------------------|
| ADVANCE                   | Central Datamart                                                                                             |
| LHSNet                    | Allina Health System<br>Arizona State University<br>Essentia Health<br>Mayo Clinic<br>Ohio State University  |
| Mid-South                 | Vanderbilt University Medical Center                                                                         |
| OneFlorida                | Central Datamart                                                                                             |
| PaTH                      | Geisinger Health<br>John Hopkins University<br>University of Pittsburgh Medical Center<br>University of Utah |
| PORTAL                    | HealthPartners<br>Kaiser Permanente Colorado<br>Kaiser Permanente Mid Atlantic                               |
| REACHnet                  | Baylor Scott and White Health<br>Ochsner Health System<br>Tulane                                             |

CDRN, Clinical Data Research Network

**Table S2. Definition of the Three Patient Groups, Ranked Lowest to Highest Risk.**

| <b>Rank</b> | <b>Patient Group</b>                                       | <b>Codes</b>                                                                          |
|-------------|------------------------------------------------------------|---------------------------------------------------------------------------------------|
| 1           | Dyslipidemia                                               | ICD-9: 272*<br>ICD10: E78*                                                            |
| 2           | LDL-C $\geq$ 130 mg/dl and not on lipid-lowering treatment | LOINC: 2089-1, 13457-7, 18262-6, 49132-4, 55440-2, 18261-8, 22748-8, 39469-2, 69419-0 |
| 3           | Coronary heart disease or coronary artery disease          | ICD-9: 414.00, 414.01, 414.9<br>ICD-10: I25.1*, I25.8*                                |

Patients who fall into more than 1 group were categorized into the highest ranking group (CHD/CAD > LDL-C  $\geq$ 130 mg/dl who were not on any lipid-lowering treatment > dyslipidemia)

ICD, International Classification of Diseases; LOINC, Logical Observation Identifiers

Names and Codes; LDL-C, low-density lipoprotein cholesterol

\* = all modifiers included with code

**Table S3. Diagnostic Codes to Identify Comorbid Conditions.**

| <b>Condition</b>            | <b>ICD-9</b>                                                            | <b>ICD-10</b>                                                                                                                                                                                                                                                                                                                                                                                                                                                                                                                                                                                                                                                                                                                                                                                  |
|-----------------------------|-------------------------------------------------------------------------|------------------------------------------------------------------------------------------------------------------------------------------------------------------------------------------------------------------------------------------------------------------------------------------------------------------------------------------------------------------------------------------------------------------------------------------------------------------------------------------------------------------------------------------------------------------------------------------------------------------------------------------------------------------------------------------------------------------------------------------------------------------------------------------------|
| Obesity                     | V853*, V854*                                                            | Z683*, Z684*                                                                                                                                                                                                                                                                                                                                                                                                                                                                                                                                                                                                                                                                                                                                                                                   |
| Hypertension                | 401, 401.0, 401.1, 401.9                                                | I10                                                                                                                                                                                                                                                                                                                                                                                                                                                                                                                                                                                                                                                                                                                                                                                            |
| Chronic kidney disease      | 585*                                                                    | N18*                                                                                                                                                                                                                                                                                                                                                                                                                                                                                                                                                                                                                                                                                                                                                                                           |
| Peripheral vascular disease | 443*                                                                    | I73*                                                                                                                                                                                                                                                                                                                                                                                                                                                                                                                                                                                                                                                                                                                                                                                           |
| Myocardial Infarction       | 410*, 412                                                               | I252, I21*, I22*                                                                                                                                                                                                                                                                                                                                                                                                                                                                                                                                                                                                                                                                                                                                                                               |
| Hemorrhagic stroke          | 431                                                                     | I61.0, I61.1, I61.2, I61.3, I61.4, I61.5, I61.6, I61.8, I61.9                                                                                                                                                                                                                                                                                                                                                                                                                                                                                                                                                                                                                                                                                                                                  |
| Ischemic stroke             | 434.00, 434.01, 434.10, 434.11, 434.90, 434.91                          | I63.00, I63.011, I63.012, I63.013, I63.019, I63.02, I63.031, I63.032, I63.033, I63.039, I63.09, I63.10, I63.111, I63.112, I63.113, I63.119, I63.12, I63.131, I63.132, I63.133, I63.139, I63.19, I63.20, I63.211, I63.212, I63.213, I63.219, I63.22, I63.231, I63.232, I63.233, I63.239, I63.29, I63.30, I63.311, I63.312, I63.313, I63.319, I63.321, I63.322, I63.323, I63.329, I63.331, I63.332, I63.333, I63.339, I63.341, I63.342, I63.343, I63.349, I63.39, I63.40, I63.411, I63.412, I63.413, I63.419, I63.421, I63.422, I63.423, I63.429, I63.431, I63.432, I63.433, I63.439, I63.441, I63.442, I63.443, I63.449, I63.49, I63.50, I63.511, I63.512, I63.513, I63.519, I63.521, I63.522, I63.523, I63.529, I63.531, I63.532, I63.533, I63.539, I63.541, I63.542, I63.543, I63.549, I63.59 |
| Transient ischemic attack   | 435.0, 435.1, 435.2, 435.3, 435.8, 435.9                                | G45.0, G45.1, G45.2, G45.3, G45.4, G45.8, G45.9                                                                                                                                                                                                                                                                                                                                                                                                                                                                                                                                                                                                                                                                                                                                                |
| Diabetes                    | 250.00, 250.02, 250.10, 250.12, 250.20, 250.22, 250.30, 250.32, 250.40, | E11*                                                                                                                                                                                                                                                                                                                                                                                                                                                                                                                                                                                                                                                                                                                                                                                           |

250.42, 250.50, 250.52,  
250.60, 250.62, 250.70,  
250.72, 250.80, 250.82,  
250.90, 250.92

---

ICD, International Classification of Diseases

\* = all modifiers included with code
